# Supplementary material for: Differential chromatin accessibility landscape of gain-of-function mutant p53 tumours
Source: Springer Nature journal article supplement (doi:10.1186/s12885-021-08362-x), 2021-06-05

### Figure S1

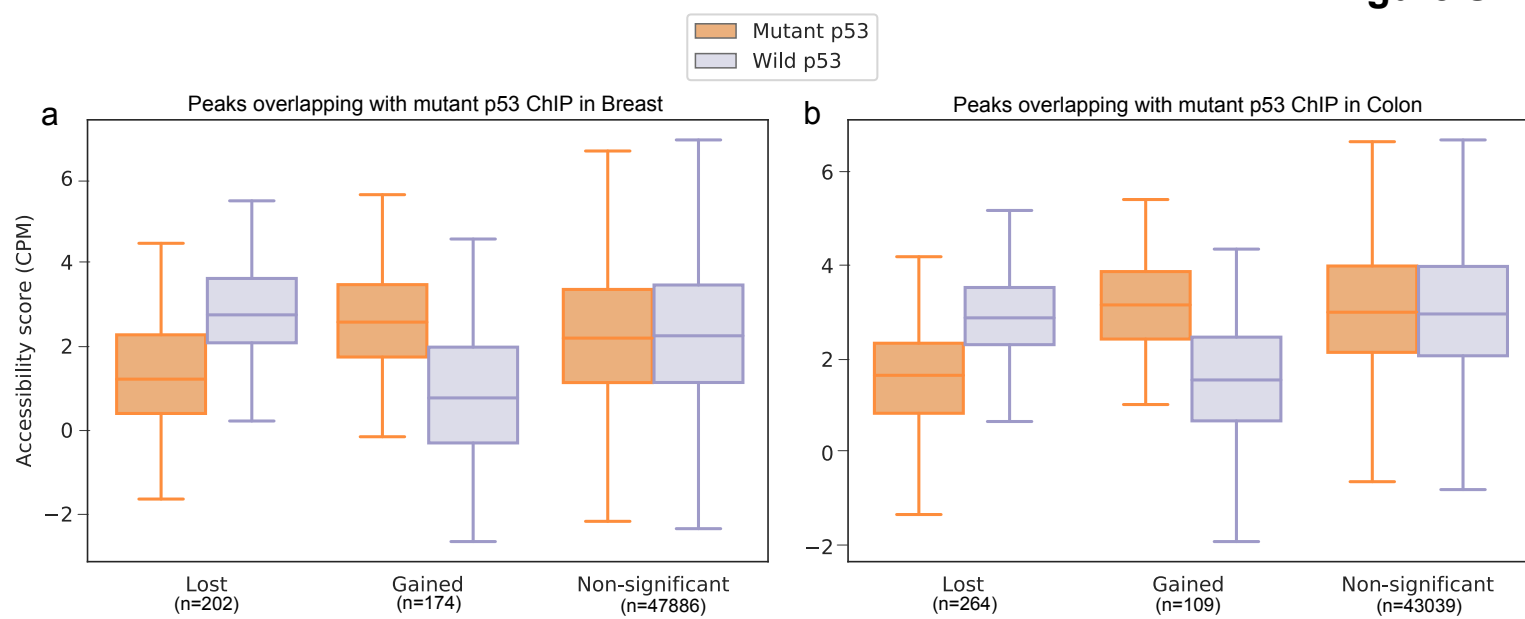

### Figure S2

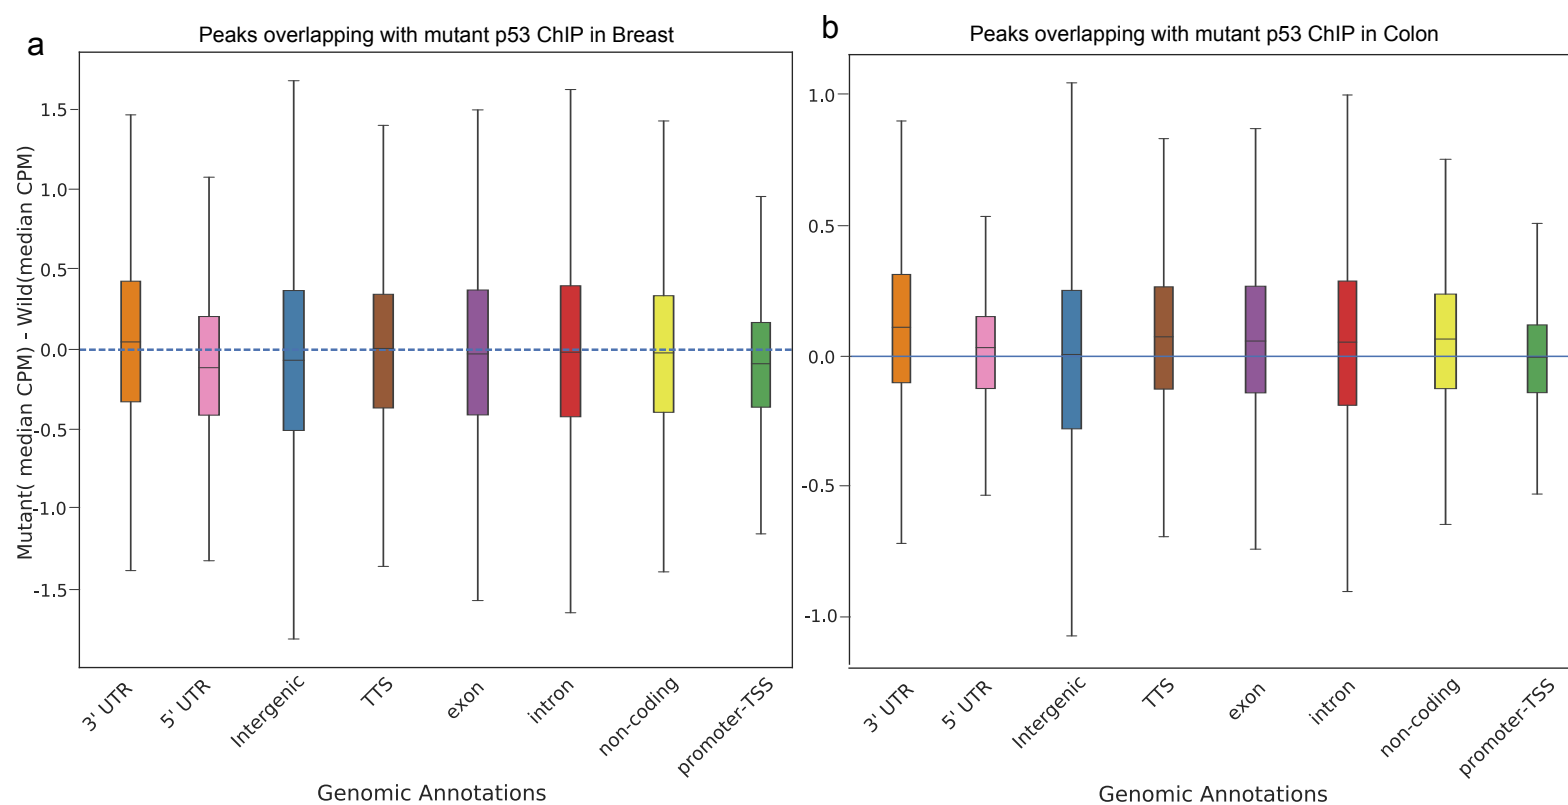

### Figure S3

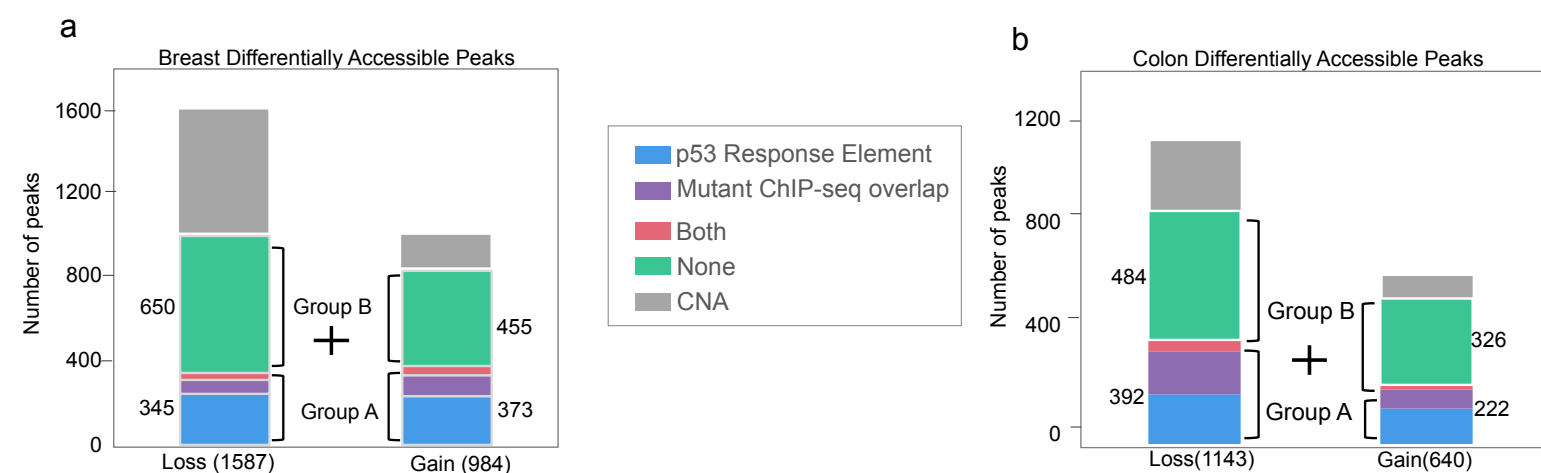

### Figure S4

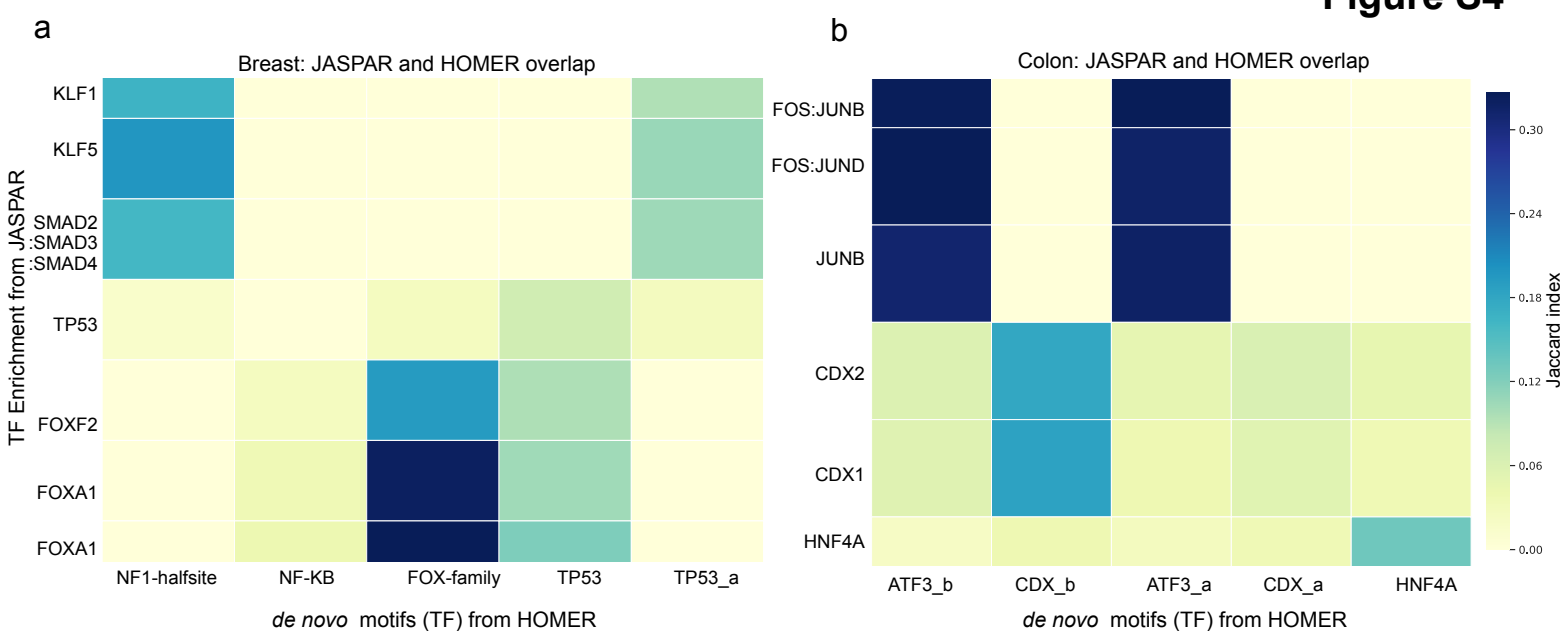

Supplement: MOESM2 [file 19232254]
