# Supplementary material for: Differential chromatin accessibility landscape of gain-of-function mutant p53 tumours
Source: Springer Nature journal article supplement (doi:10.1186/s12885-021-08362-x), 2021-06-05
Supplement: MOESM3 [file 19232254]

**Additional File 3: de novo motifs result from HOMER analysis of group A and B differentially accessible peaks.**

| Breast Group A Gain (target= 373; background= 49288) |       |         |             |              |                 |                   |                 |
|------------------------------------------------------|-------|---------|-------------|--------------|-----------------|-------------------|-----------------|
| Rank                                                 | Motif | P-value | log P-value | % of Targets | % of Background | STD(Bg STD)       | Best Match      |
| 1                                                    |       | 1e-36   | -8.293e+01  | 37.27%       | 12.36%          | 140.6bp (155.7bp) | P53/Jaspar      |
| 2                                                    |       | 1e-13   | -3.108e+01  | 27.08%       | 12.50%          | 147.8bp (152.7bp) | LHX2/Jaspar     |
| Breast Group A Loss (target= 345; background= 49264) |       |         |             |              |                 |                   |                 |
| Rank                                                 | Motif | P-value | log P-value | % of Targets | % of Background | STD(Bg STD)       | Best Match      |
| 1                                                    |       | 1e-40   | -9.21e+01   | 62.90%       | 30.11%          | 130.7bp (154.7bp) | P53/Jaspar      |
| 2                                                    |       | 1e-15   | -3.485e+01  | 17.10%       | 5.15%           | 138.3bp (148.4bp) | FOXA1           |
| Breast Group B Gain (target= 455; background= 49276) |       |         |             |              |                 |                   |                 |
| Rank                                                 | Motif | P-value | log P-value | % of Targets | % of Background | STD(Bg STD)       | Best Match      |
| 1                                                    |       | 1e-23   | -5.419e+01  | 44.40%       | 22.84%          | 119.9bp (157.3bp) | NF1-halfsite    |
| 2                                                    |       | 1e-12   | -2.943e+01  | 16.70%       | 6.64%           | 130.9bp (157.6bp) | TFAP2B          |
| Breast Group B Loss (target= 650; background= 49101) |       |         |             |              |                 |                   |                 |
| Rank                                                 | Motif | P-value | log P-value | % of Targets | % of Background | STD(Bg STD)       | Best Match      |
| 1                                                    |       | 1e-71   | -1.634e+02  | 42.31%       | 19.43%          | 111.4bp (148.7bp) | FOX_Family      |
| 2                                                    |       | 1e-27   | -6.216e+01  | 10.31%       | 2.73%           | 121.0bp (142.5bp) | Hnf6b           |
| 3                                                    |       | 1e-27   | -6.216e+01  | 6.92%        | 1.75%           | 114.8bp (144.4bp) | NFkB-p65-Rel    |
| 4                                                    |       | 1e-12   | -2.947e+01  | 8.15%        | 2.51%           | 130.2bp (154.5bp) | Zic1::Zic2      |
| Colon Group A Gain (target= 222; background= 47919)  |       |         |             |              |                 |                   |                 |
| Rank                                                 | Motif | P-value | log P-value | % of Targets | % of Background | STD(Bg STD)       | Best Match      |
| 1                                                    |       | 1e-13   | -3.170e+01  | 2.25%        | 0.00%           | 77.2bp (67.9bp)   | GCM2            |
| 2                                                    |       | 1e-13   | -2.999e+01  | 36.04%       | 15.67%          | 128.9bp (153.0bp) | CDX_Family      |
| 3                                                    |       | 1e-12   | -2.905e+01  | 33.33%       | 13.99%          | 121.0bp (151.4bp) | POL004.1/Jaspar |
| 4                                                    |       | 1e-12   | -2.797e+01  | 9.91%        | 1.35%           | 110.0bp (149.7bp) | PB0040.1/Jaspar |

**Colon Group A Loss (target= 392; background= 49626)**

| Rank | Motif                                                                             | P-value | log P-value | % of Targets | % of Background | STD(Bg STD)          | Best Match      |
|------|-----------------------------------------------------------------------------------|---------|-------------|--------------|-----------------|----------------------|-----------------|
| 1    |  | 1e-217  | -4.999e+02  | 44.16%       | 4.86%           | 75.9bp<br>(152.0bp)  | ATF3            |
| 2    |  | 1e-19   | -4.555e+01  | 30.46%       | 12.67%          | 108.8bp<br>(152.3bp) | Klf4            |
| 3    |  | 1e-16   | -3.749e+01  | 2.79%        | 0.04%           | 179.5bp<br>(152.7bp) | PB0132.1/Jaspar |
| 4    |  | 1e-15   | -3.543e+01  | 17.51%       | 5.83%           | 114.1bp<br>(151.7bp) | Foxo3           |
| 5    |  | 1e-14   | -3.348e+01  | 18.02%       | 6.37%           | 119.8bp<br>(154.4bp) | PB0022.1/Jaspar |

**Colon Group B Gain (target= 326; background= 49101)**

| Rank | Motif                                                                             | P-value | log P-value | % of Targets | % of Background | STD(Bg STD)          | Best Match |
|------|-----------------------------------------------------------------------------------|---------|-------------|--------------|-----------------|----------------------|------------|
| 1    |  | 1e-33   | -7.59e+01   | 38.70%       | 14.33%          | 113.2bp<br>(148.6bp) | CDX1       |
| 2    |  | 1e-27   | -6.353e+01  | 21.98%       | 4.57%           | 103.4bp<br>(149.3bp) | HNF4A      |

**Colon Group B Loss (target= 484; background= 49414)**

| Rank | Motif                                                                               | P-value | log P-value | % of Targets | % of Background | STD(Bg STD)          | Best Match |
|------|-------------------------------------------------------------------------------------|---------|-------------|--------------|-----------------|----------------------|------------|
| 1    |  | 1e-120  | -2.762e+02  | 43.06%       | 8.45%           | 75.7bp<br>(151.5bp)  | ATF3       |
| 2    |  | 1e-29   | -6.697e+01  | 23.40%       | 7.04%           | 118.8bp<br>(148.1bp) | ISRE(IRF)  |
| 3    |  | 1e-22   | -5.197e+01  | 11.18%       | 2.07%           | 111.3bp<br>(154.7bp) | HNF1b      |
| 4    |  | 1e-17   | -4.030e+01  | 49.48%       | 30.56%          | 136.9bp<br>(149.5bp) | GATA2      |
| 5    |  | 1e-15   | -3.663e+01  | 27.12%       | 13.01%          | 117.8bp<br>(149.4bp) | Klf1       |
| 6    |  | 1e-14   | -3.335e+01  | 32.51%       | 17.72%          | 118.4bp<br>(149.9bp) | FOXP1      |
